# Supplementary material for: Europium ion post-functionalized zirconium metal–organic frameworks as luminescent probes for effectively sensing hydrazine hydrate
Source: Royal Society of Chemistry journal article supplement (doi:10.1039/c8ra03049a), 2018-01-01
Supplement: c8ra03049a1.pdf [file c8ra03049a1.pdf]

## **Electronic Supplementary Information (ESI)**

### **Europium ion post-functionalized zirconium metal-organic frameworks as a luminescent probe for effectively sensing hydrazine hydrate**

Yunhui Yang<sup>1</sup>, Xiaofei Liu<sup>1</sup>, Dan Yan<sup>2</sup>, Ping Deng<sup>1</sup>, Zhiyong Guo<sup>1,\*</sup>, Hongbing Zhan<sup>1,3</sup>

<sup>1</sup> *College of Materials Science and Engineering, Fuzhou University, Fuzhou, Fujian, 350116, PR China.*

<sup>2</sup> *Testing Center, Fuzhou University, Fuzhou, Fujian, PR China.*

<sup>3</sup> *Key Laboratory of Eco-materials Advanced Technology, Fuzhou University, Fujian Province, PR China.*

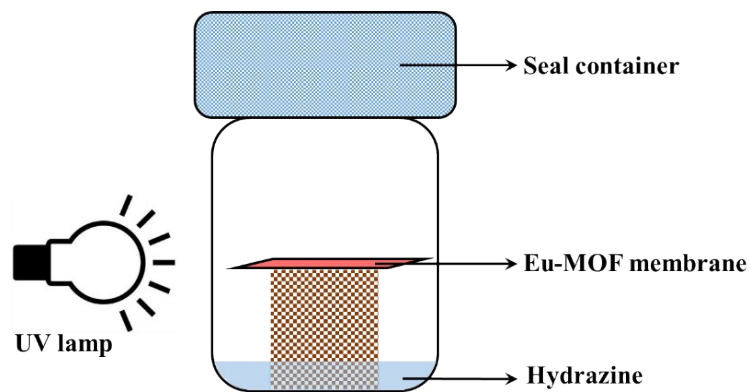

**Scheme S1** Diagram of gas-sensing measurements for hydrazine vapors

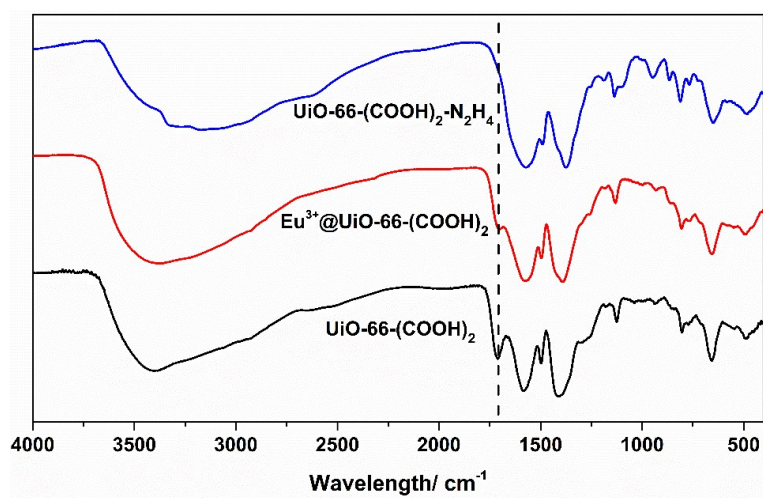

**Fig. S1** FT-IR spectra of  $\text{UiO-66-(COOH)}_2$ ,  $\text{Eu}^{3+}\text{@UiO-66-(COOH)}_2$  and  $\text{Eu}^{3+}\text{@UiO-66-(COOH)}_2$  under hydrazine treatment.

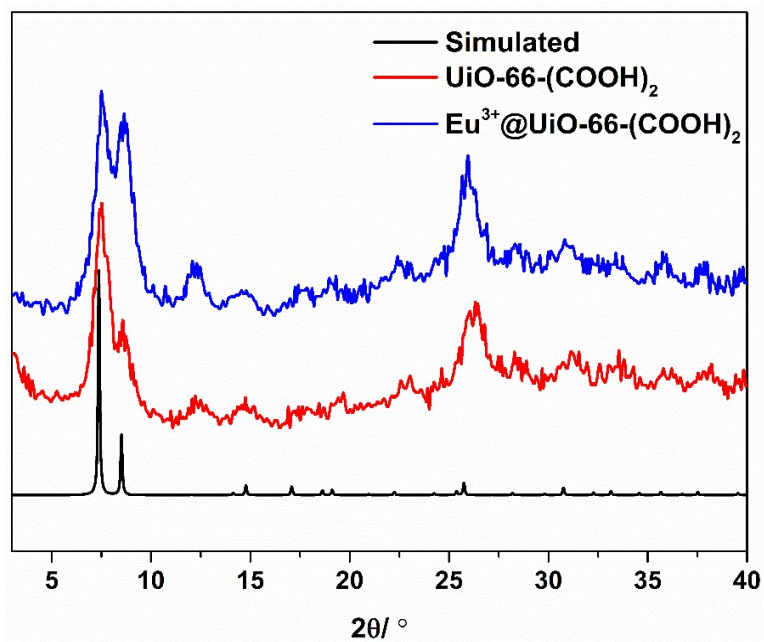

**Fig. S2** PXR D patterns of the simulated UiO-66, the as-synthesized UiO-66-(COOH)<sub>2</sub> and Eu<sup>3+</sup>@UiO-66-(COOH)<sub>2</sub>.

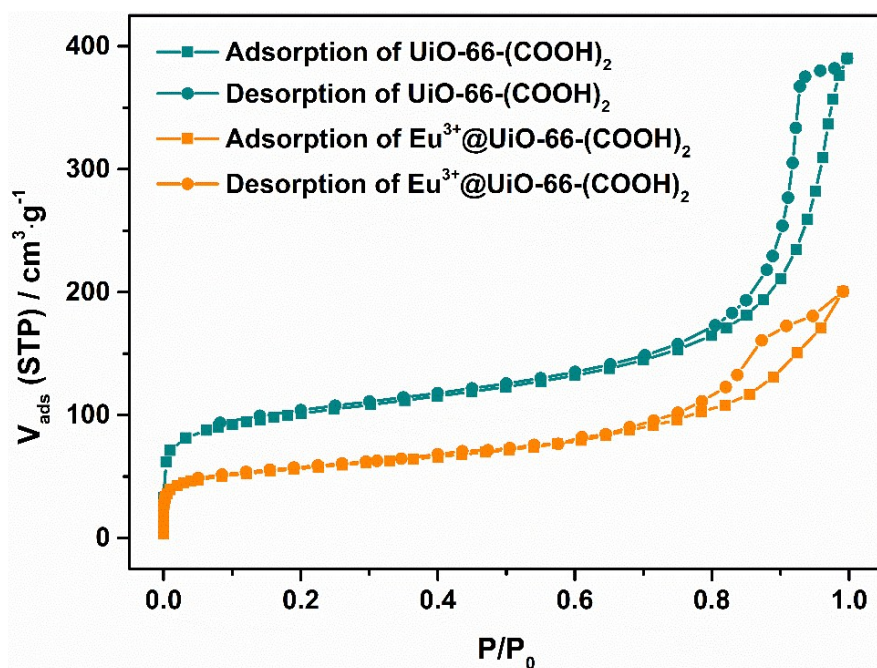

**Fig. S3** N<sub>2</sub> adsorption-desorption isotherms of UiO-66-(COOH)<sub>2</sub> and Eu<sup>3+</sup>@UiO-66-(COOH)<sub>2</sub>

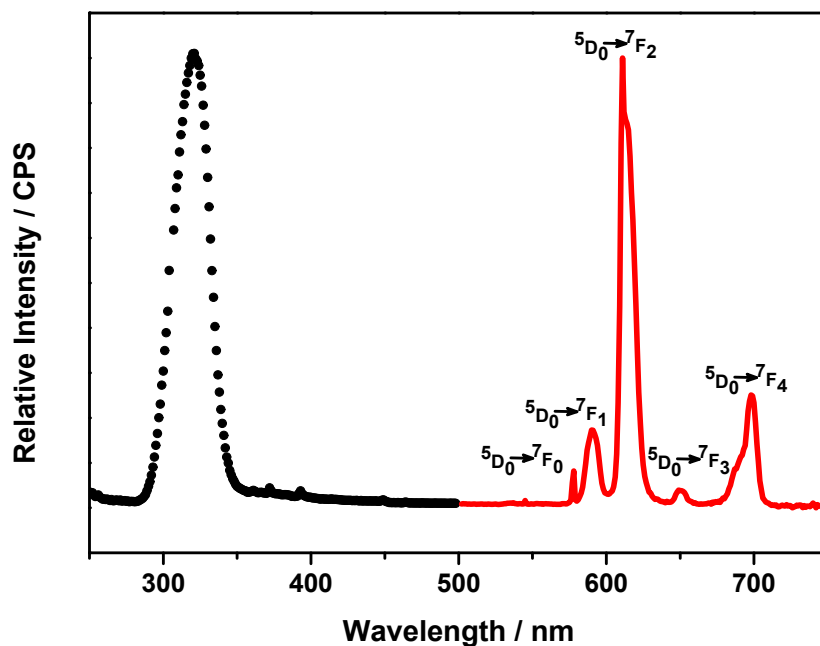

**Fig. S4** The excitation ( $\lambda_{\text{ex}}=321$  nm, black dotted line) and emission ( $\lambda_{\text{em}}=611$  nm, red solid line) spectra of  $\text{Eu}^{3+}@\text{UiO-66}-(\text{COOH})_2$ .

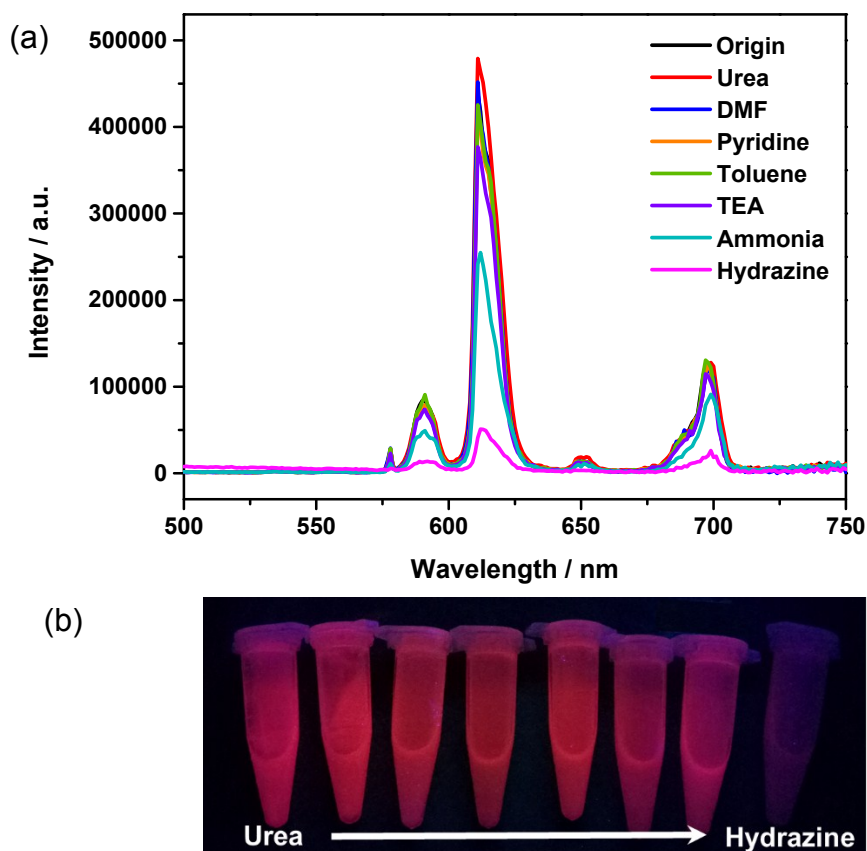

**Fig. S5** (a) The emission intensity of  $\text{Eu}^{3+}@\text{UiO-66}-(\text{COOH})_2$  at 611 nm under various components. (100 mM,  $\lambda_{\text{ex}} = 321$  nm) (b) Photography of the  $\text{Eu}^{3+}@\text{UiO-66}-(\text{COOH})_2$  in various components.

(COOH)<sub>2</sub> in various components under 365 nm UV irradiation.

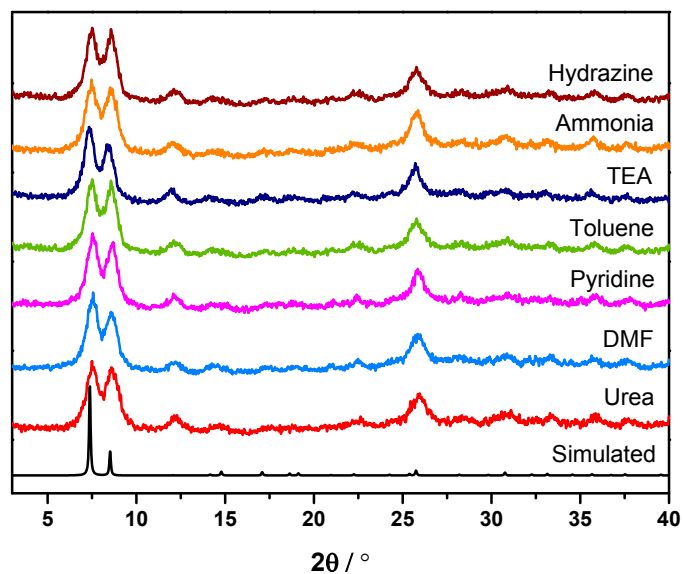

**Fig. S6** PXRD patterns of  $\text{Eu}^{3+}@\text{UiO-66}-(\text{COOH})_2$  towards various analytes in ethanol solution.

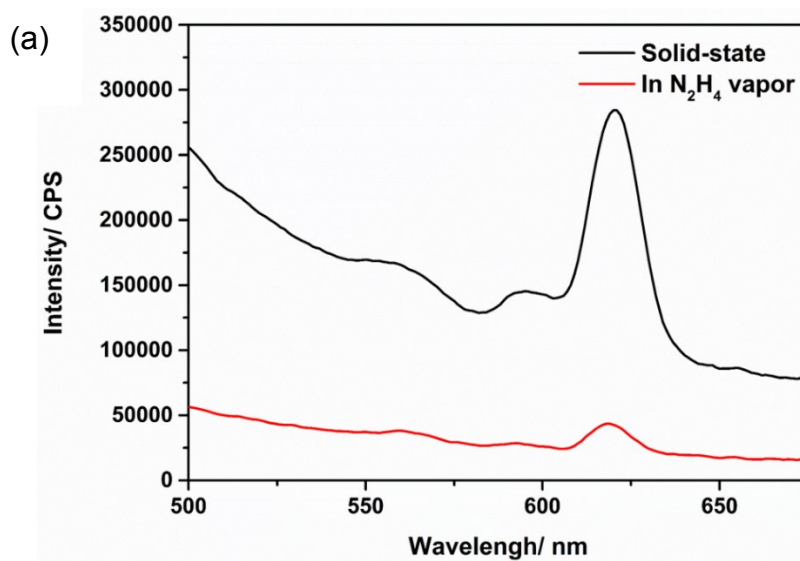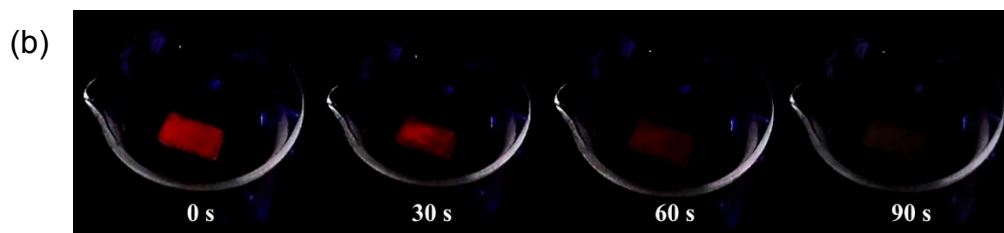

**Fig. S7** (a) The emission intensity of  $\text{Eu}^{3+}@\text{UiO-66}-(\text{COOH})_2$  before and after hydrazine introduction. (b) Photographs of the  $\text{Eu}^{3+}@\text{UiO-66}-(\text{COOH})_2$  in different

hydrazine exposure time under 365 nm UV irradiation.

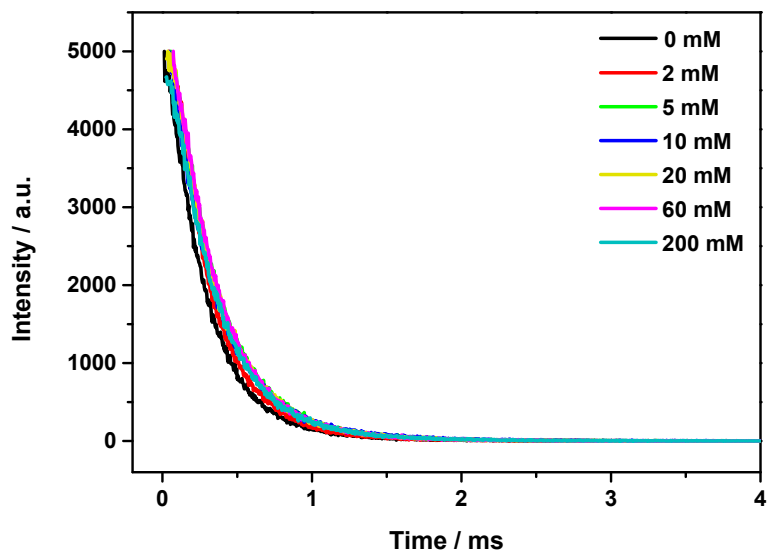

**Fig. S8** Fluorescent lifetime of  $\text{Eu}^{3+}@\text{UiO-66}-(\text{COOH})_2$  and under different concentrations of hydrazine hydrate.

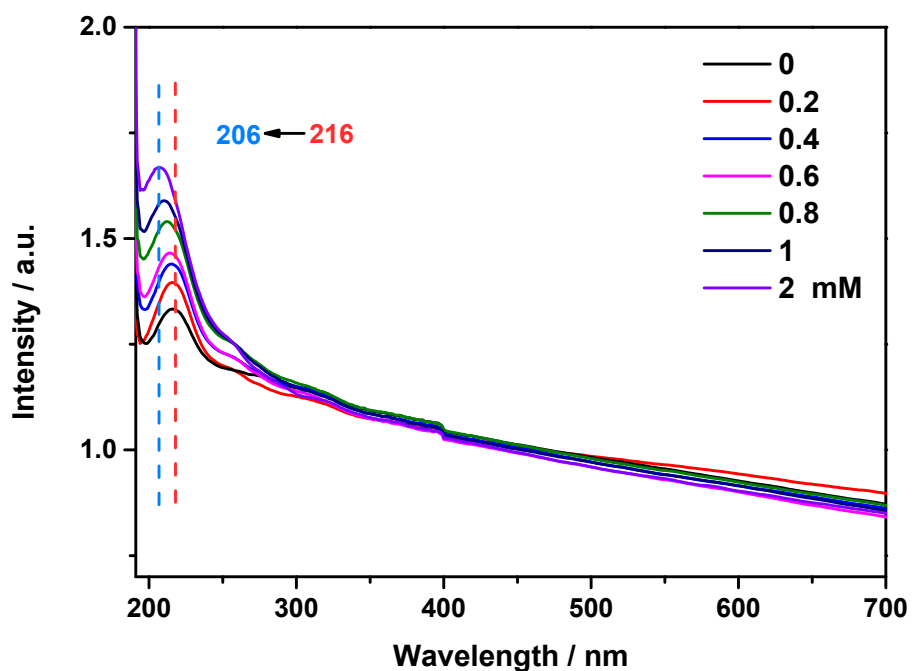

**Fig. S9** UV-vis adsorption spectra of  $\text{Eu}^{3+}@\text{UiO-66}-(\text{COOH})_2$  before and after hydrazine treatment.

**Table S1** The ICP-MS results of  $\text{Eu}^{3+}@\text{UiO-66-(COOH)}_2$ .

| <b>Material</b>                                                                                 | <b>Zr<sup>4+</sup></b> | <b>Eu<sup>3+</sup></b> | <b>Molecular ratio<br/>Zr : Eu</b> |
|-------------------------------------------------------------------------------------------------|------------------------|------------------------|------------------------------------|
| <b>Eu<sup>3+</sup>@UiO-66-(COOH)<sub>2</sub></b>                                                | 7.532 ppb              | 27.600 ppb             | 1:2.20                             |
|                                                                                                 | 82.57 nM               | 181.62 nM              |                                    |
| <b>Eu<sup>3+</sup>@UiO-66-(COOH)<sub>2</sub><br/>after N<sub>2</sub>H<sub>4</sub> treatment</b> | 6.610 ppb              | 24.336 ppb             | 1:2.21                             |
|                                                                                                 | 72.46 nM               | 160.14 nM              |                                    |
